# Supplementary material
Source: PubMed Central journal article supplement (PMC8176850)
Supplement: NIHMS1688249-supplement-1.pdf [file NIHMS1688249-supplement-1.pdf]

**Figure S1:** DCD-Q total, fine-motor, gross-motor, and general coordination scores as a function of SCQ, RBS-R, cognitive, language, and functional impairment categories in children with ASD.

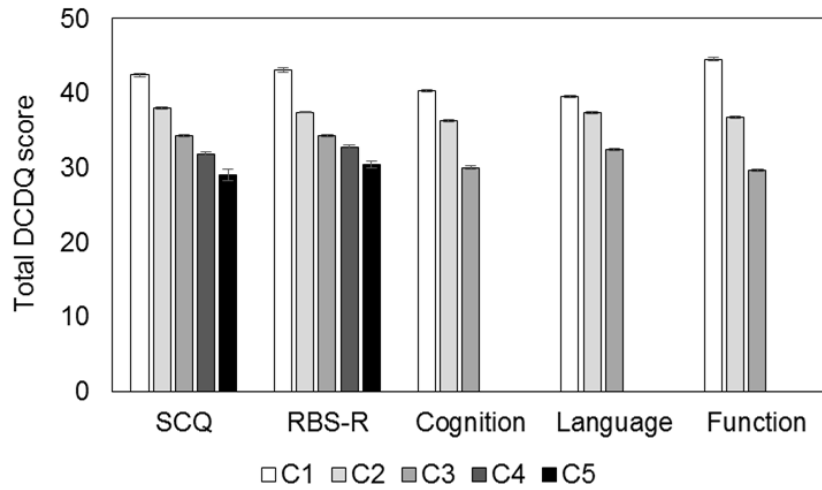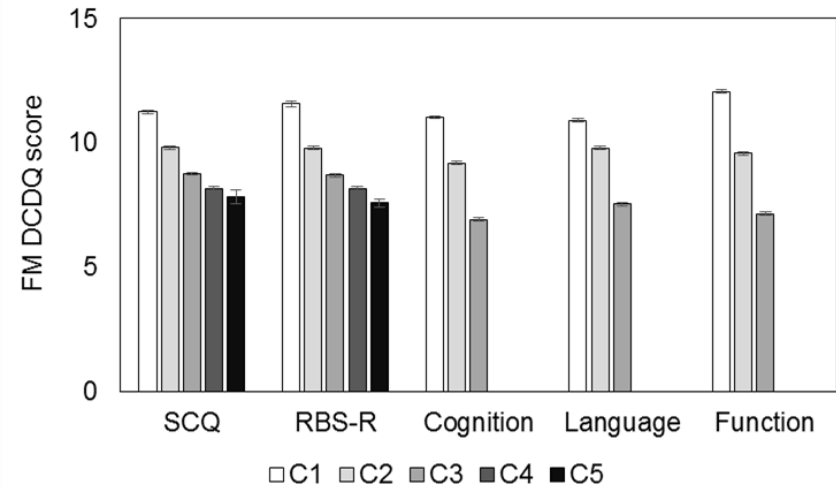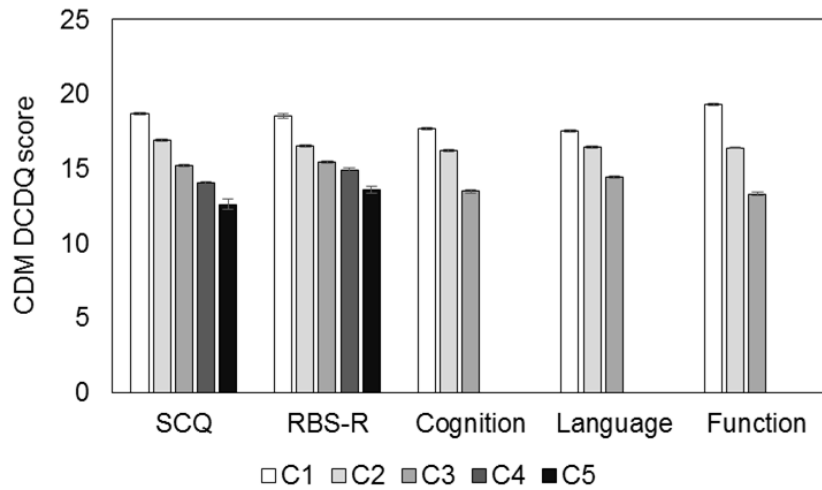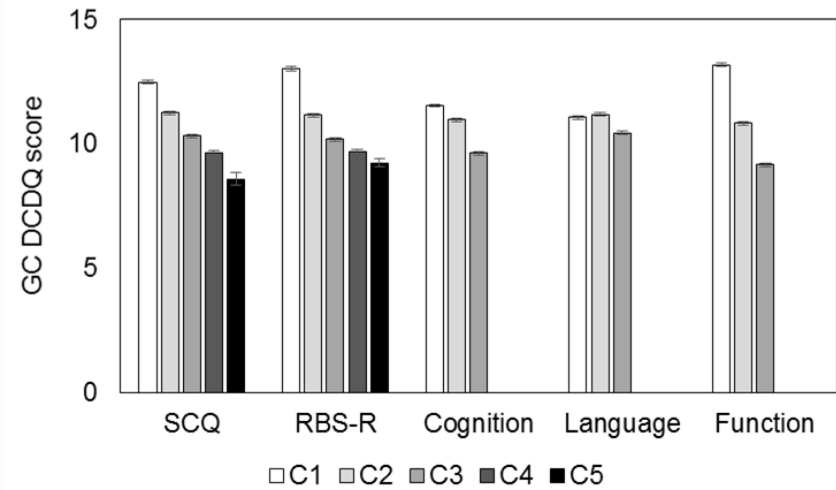

**Table S1:** Sample size, Mean, standard error, and confidence intervals for DCD-Q fine-motor (FM) scores across SCQ, RBS-R, cognitive, language, and functional impairment categories in children with ASD.

| Categories                                                                                      | N    | Mean | Std. Error | Lower 95% | Upper 95% |
|-------------------------------------------------------------------------------------------------|------|------|------------|-----------|-----------|
| <b>Fine Motor Handwriting DCD-Q score as a function of social communication (SC) impairment</b> |      |      |            |           |           |
| Very low SCI                                                                                    | 2716 | 11.2 | 0.08       | 11.1      | 11.4      |
| Low SCI                                                                                         | 4276 | 9.8  | 0.07       | 9.7       | 10.0      |
| High SCI                                                                                        | 4448 | 8.8  | 0.07       | 8.6       | 8.9       |
| Very high SCI                                                                                   | 2188 | 8.2  | 0.09       | 8.0       | 8.3       |
| Extremely high SCI                                                                              | 259  | 7.8  | 0.27       | 7.3       | 8.4       |
| <b>Fine Motor Handwriting DCD-Q score as a function of repetitive behavior (RB) severity</b>    |      |      |            |           |           |
| Very low RBs                                                                                    | 1833 | 11.6 | 0.10       | 11.4      | 11.8      |
| Low RBs                                                                                         | 6169 | 9.8  | 0.06       | 9.7       | 9.9       |
| High RBs                                                                                        | 3682 | 8.7  | 0.07       | 8.6       | 8.8       |
| Very high RBs                                                                                   | 1505 | 8.2  | 0.11       | 7.9       | 8.4       |
| Extremely high RBs                                                                              | 614  | 7.6  | 0.18       | 7.2       | 7.9       |
| <b>Fine Motor Handwriting DCD-Q score as a function of cognitive ability</b>                    |      |      |            |           |           |
| No cognition delay, ASD                                                                         | 6080 | 11.0 | 0.05       | 10.9      | 11.1      |
| Some cognition delay, ASD                                                                       | 3756 | 9.2  | 0.07       | 9.1       | 9.3       |
| Significant cognition delay, ASD                                                                | 3361 | 6.9  | 0.07       | 6.8       | 7.0       |
| <b>Fine Motor Handwriting DCD-Q score as a function of language ability</b>                     |      |      |            |           |           |
| No language delay, ASD                                                                          | 5143 | 10.9 | 0.06       | 10.8      | 11.0      |
| Some language delay, ASD                                                                        | 3716 | 9.8  | 0.07       | 9.7       | 9.9       |
| Significant language delay, ASD                                                                 | 4564 | 7.5  | 0.06       | 7.4       | 7.7       |
| <b>Fine Motor Handwriting DCD-Q score as a function of functional ability</b>                   |      |      |            |           |           |
| No functional delay, ASD                                                                        | 3044 | 12.1 | 0.07       | 11.9      | 12.2      |
| Some functional delay, ASD                                                                      | 6566 | 9.6  | 0.05       | 9.5       | 9.7       |
| Significant functional delay, ASD                                                               | 3839 | 7.1  | 0.07       | 7.0       | 7.3       |

Apart from 2 exceptions (i.e., C4-C5 SCI categories,  $p > 0.1$  for SCI, a trend of  $p = 0.05$  for RBS-R), all comparisons for FM/handwriting scores differed ( $p_s < 0.0074$ , 95% CI does not include a null value) with FM/handwriting DCD-Q scores worsening with increasing impairment - SC impairment, RB severity, functional, cognitive, and language impairments.

**Table S2:** Sample size, Mean, standard error, and confidence intervals for DCD-Q gross-motor/control during movement (CDM) scores across SCQ, RBS-R, cognitive, language, and functional impairment categories in children with ASD.

| Categories                                                                                       | N    | Mean | Std. Error | Lower 95% | Upper 95% |
|--------------------------------------------------------------------------------------------------|------|------|------------|-----------|-----------|
| <b>Control During Movement DCD-Q score as a function of social communication (SC) impairment</b> |      |      |            |           |           |
| Very low SCI                                                                                     | 2716 | 18.7 | 0.11       | 18.5      | 18.9      |
| Low SCI                                                                                          | 4276 | 16.9 | 0.09       | 16.8      | 17.1      |
| High SCI                                                                                         | 4448 | 15.2 | 0.08       | 15.0      | 15.4      |
| Very high SCI                                                                                    | 2188 | 14.1 | 0.12       | 13.8      | 14.3      |
| Extremely high SCI                                                                               | 259  | 12.6 | 0.35       | 11.9      | 13.3      |
| <b>Control During Movement DCD-Q score as a function of repetitive behavior (RB) severity</b>    |      |      |            |           |           |
| Very low RBs                                                                                     | 1833 | 18.5 | 0.13       | 18.3      | 18.8      |
| Low RBs                                                                                          | 6169 | 16.5 | 0.07       | 16.4      | 16.7      |
| High RBs                                                                                         | 3682 | 15.5 | 0.10       | 15.3      | 15.6      |
| Very high RBs                                                                                    | 1505 | 14.9 | 0.15       | 14.6      | 15.2      |
| Extremely high RBs                                                                               | 614  | 13.6 | 0.23       | 13.2      | 14.1      |
| <b>Control During Movement DCD-Q score as a function of cognitive ability</b>                    |      |      |            |           |           |
| No cognition delay, ASD                                                                          | 6080 | 17.7 | 0.07       | 17.6      | 17.8      |
| Some cognition delay, ASD                                                                        | 3756 | 16.2 | 0.09       | 16.0      | 16.4      |
| Significant cognition delay, ASD                                                                 | 3361 | 13.5 | 0.10       | 13.3      | 13.7      |
| <b>Control During Movement DCD-Q score as a function of language ability</b>                     |      |      |            |           |           |
| No language delay, ASD                                                                           | 5143 | 17.5 | 0.08       | 17.4      | 17.7      |
| Some language delay, ASD                                                                         | 3716 | 16.5 | 0.09       | 16.3      | 16.6      |
| Significant language delay, ASD                                                                  | 4564 | 14.4 | 0.08       | 14.3      | 14.6      |
| <b>Control During Movement DCD-Q score as a function of functional ability</b>                   |      |      |            |           |           |
| No functional delay, ASD                                                                         | 3044 | 19.3 | 0.10       | 19.1      | 19.5      |
| Some functional delay, ASD                                                                       | 6566 | 16.4 | 0.07       | 16.3      | 16.5      |
| Significant functional delay, ASD                                                                | 3839 | 13.3 | 0.09       | 13.1      | 13.5      |

Apart from 1 exception (C3-C4 categories of RBS-R,  $p=0.02$ ), all comparisons for CDM scores differed ( $ps < 0.0012$ , 95% CI does not include a null value) with gross-motor/CDM DCD-Q scores worsening with increasing impairment - SC impairment, RB severity, functional, cognitive and language impairments.

**Table S3:** Sample size, Mean, standard error, and confidence intervals for DCD-Q general coordination (GC) scores across SCQ, RBS-R, cognitive, language, and functional impairment categories in children with ASD.

| Categories                                                                                    | N    | Mean | Std. Error | Lower 95% | Upper 95% |
|-----------------------------------------------------------------------------------------------|------|------|------------|-----------|-----------|
| <b>General Coordination DCD-Q score as a function of social communication (SC) impairment</b> |      |      |            |           |           |
| Very low SCI                                                                                  | 2716 | 12.5 | 0.08       | 12.3      | 12.6      |
| Low SCI                                                                                       | 4276 | 11.2 | 0.06       | 11.1      | 11.4      |
| High SCI                                                                                      | 4448 | 10.3 | 0.06       | 10.2      | 10.4      |
| Very high SCI                                                                                 | 2188 | 9.7  | 0.09       | 9.5       | 9.8       |
| Extremely high SCI                                                                            | 259  | 8.6  | 0.25       | 8.1       | 9.1       |
| <b>General Coordination DCD-Q score as a function of repetitive behavior (RB) severity</b>    |      |      |            |           |           |
| Very low RBs                                                                                  | 1833 | 13.0 | 0.10       | 12.8      | 13.2      |
| Low RBs                                                                                       | 6169 | 11.2 | 0.05       | 11.0      | 11.3      |
| High RBs                                                                                      | 3682 | 10.2 | 0.07       | 10.1      | 10.3      |
| Very high RBs                                                                                 | 1505 | 9.7  | 0.11       | 9.5       | 9.9       |
| Extremely high RBs                                                                            | 614  | 9.2  | 0.17       | 8.9       | 9.6       |
| <b>General Coordination DCD-Q score as a function of cognitive ability</b>                    |      |      |            |           |           |
| No cognition delay, ASD                                                                       | 6080 | 11.6 | 0.05       | 11.4      | 11.7      |
| Some cognition delay, ASD                                                                     | 3756 | 11.0 | 0.07       | 10.8      | 11.1      |
| Significant cognition delay, ASD                                                              | 3361 | 9.6  | 0.07       | 9.5       | 9.8       |
| <b>General Coordination DCD-Q score as a function of language ability</b>                     |      |      |            |           |           |
| No language delay, ASD                                                                        | 5143 | 11.1 | 0.06       | 10.9      | 11.2      |
| Some language delay, ASD                                                                      | 3716 | 11.2 | 0.07       | 11.0      | 11.3      |
| Significant language delay, ASD                                                               | 4564 | 10.4 | 0.06       | 10.3      | 10.6      |
| <b>General Coordination DCD-Q score as a function of functional ability</b>                   |      |      |            |           |           |
| No functional delay, ASD                                                                      | 3044 | 13.2 | 0.07       | 13.0      | 13.3      |
| Some functional delay, ASD                                                                    | 6566 | 10.8 | 0.05       | 10.7      | 10.9      |
| Significant functional delay, ASD                                                             | 3839 | 9.2  | 0.06       | 9.0       | 9.3       |

Apart from 2 exceptions (i.e., both C4-C5 categories of RBS-R and L1-L2 categories of language impairments,  $p > 0.1$ ) all comparisons for GC scores differed ( $p < 0.0007$ , 95% CI does not include a null value) with GC scores worsening with increasing impairment - SC impairment, RB severity, functional, cognitive impairments and lastly, language impairments.

**Table S4:** Effects sizes for comparisons across categories for DCD-Q total and subscale (fine motor (FM), gross-motor/control during movement (CDM), general coordination (GC)) scores.

| <b>SCQ Category Pairs</b>       | <b>Total DCDQ</b> | <b>FM DCDQ</b> | <b>CDM DCDQ</b> | <b>GC DCDQ</b> |
|---------------------------------|-------------------|----------------|-----------------|----------------|
| C1 : C2                         | 0.38              | 0.33           | 0.31            | 0.30           |
| <b>C1 : C3</b>                  | <b>0.70</b>       | <b>0.57</b>    | <b>0.62</b>     | <b>0.53</b>    |
| <b>C1 : C4</b>                  | <b>0.91</b>       | <b>0.71</b>    | <b>0.82</b>     | <b>0.69</b>    |
| <b>C1 : C5</b>                  | <b>1.15</b>       | <b>0.79</b>    | <b>1.07</b>     | <b>0.95</b>    |
| C2 : C3                         | 0.32              | 0.24           | 0.31            | 0.23           |
| <b>C2 : C4</b>                  | <b>0.53</b>       | 0.38           | <b>0.51</b>     | 0.39           |
| <b>C2 : C5</b>                  | <b>0.77</b>       | <b>0.46</b>    | <b>0.76</b>     | <b>0.65</b>    |
| C3 : C4                         | 0.21              | 0.14           | 0.20            | 0.16           |
| <b>C3 : C5</b>                  | <b>0.45</b>       | 0.21           | <b>0.46</b>     | 0.42           |
| C4 : C5                         | 0.24              | 0.07           | 0.25            | 0.26           |
| <b>RBS-R Category Pairs</b>     | <b>Total DCDQ</b> | <b>FM DCDQ</b> | <b>CDM DCDQ</b> | <b>GC DCDQ</b> |
| <b>C1 : C2</b>                  | <b>0.48</b>       | 0.41           | 0.35            | <b>0.45</b>    |
| <b>C1 : C3</b>                  | <b>0.75</b>       | <b>0.66</b>    | <b>0.53</b>     | <b>0.69</b>    |
| <b>C1 : C4</b>                  | <b>0.88</b>       | <b>0.79</b>    | <b>0.63</b>     | <b>0.81</b>    |
| <b>C1 : C5</b>                  | <b>1.08</b>       | <b>0.92</b>    | <b>0.85</b>     | <b>0.92</b>    |
| C2 : C3                         | 0.27              | 0.25           | 0.19            | 0.23           |
| C2 : C4                         | 0.40              | 0.38           | 0.28            | 0.36           |
| <b>C2 : C5</b>                  | <b>0.60</b>       | <b>0.51</b>    | <b>0.50</b>     | <b>0.47</b>    |
| C3 : C4                         | 0.14              | 0.12           | 0.10            | 0.12           |
| C3 : C5                         | 0.33              | 0.25           | 0.32            | 0.23           |
| C4 : C5                         | 0.20              | 0.13           | 0.22            | 0.11           |
| <b>Cognition Category Pairs</b> | <b>Total DCDQ</b> | <b>FM DCDQ</b> | <b>CDM DCDQ</b> | <b>GC DCDQ</b> |
| C1 : C2                         | 0.34              | <b>0.45</b>    | 0.27            | 0.14           |
| <b>C1 : C3</b>                  | <b>0.90</b>       | <b>0.99</b>    | <b>0.75</b>     | <b>0.46</b>    |
| <b>C2 : C3</b>                  | <b>0.55</b>       | <b>0.55</b>    | <b>0.48</b>     | 0.32           |
| <b>Language Category Pairs</b>  | <b>Total DCDQ</b> | <b>FM DCDQ</b> | <b>CDM DCDQ</b> | <b>GC DCDQ</b> |
| C1 : C2                         | 0.18              | 0.26           | 0.19            | 0.03           |
| <b>C1 : C3</b>                  | <b>0.60</b>       | <b>0.80</b>    | <b>0.54</b>     | 0.15           |
| C2 : C3                         | 0.43              | <b>0.54</b>    | 0.35            | 0.17           |
| <b>Function Category Pairs</b>  | <b>Total DCDQ</b> | <b>FM DCDQ</b> | <b>CDM DCDQ</b> | <b>GC DCDQ</b> |
| <b>C1 : C2</b>                  | <b>0.71</b>       | <b>0.61</b>    | <b>0.53</b>     | <b>0.59</b>    |

|                |             |             |             |             |
|----------------|-------------|-------------|-------------|-------------|
| <b>C1 : C3</b> | <b>1.36</b> | <b>1.20</b> | <b>1.09</b> | <b>1.01</b> |
| <b>C2 : C3</b> | <b>0.66</b> | <b>0.59</b> | <b>0.56</b> | 0.42        |

Bolded rows highlight medium or large-sized effects for the two categories compared. Based on social communication impairment and repetitive behavior severity, 4-6 out of 10 comparisons had medium to large effect sizes for a pattern of worsening motor scores for total, fine-motor, gross-motor/CDM, and general coordination scores. Across the 3 cognitive impairment categories, 1-3 comparisons had medium to large effect sizes for a pattern of worsening motor scores for total, FM, gross-motor/CDM, and GC scores. Across the 3 language impairment categories, none to 2 comparisons had medium to large effect sizes for a pattern of worsening motor scores for total, FM, gross-motor/CDM, and GC scores. Across the 3 functional impairment categories, all 3 comparisons had medium to large effect sizes for a pattern of worsening motor scores for total, FM, gross-motor/CDM, and GC scores.
